# Supplementary material
Source: bioRxiv or medRxiv preprint supplement (https://medrxiv.org/highwire/filestream/68294/field_highwire_adjunct_files/1/19002014-2.pdf)
Supplement: Supplementary file [file 19002014-2.pdf]

**A** Median methylation of *Alu* repetitive elements by tissue type

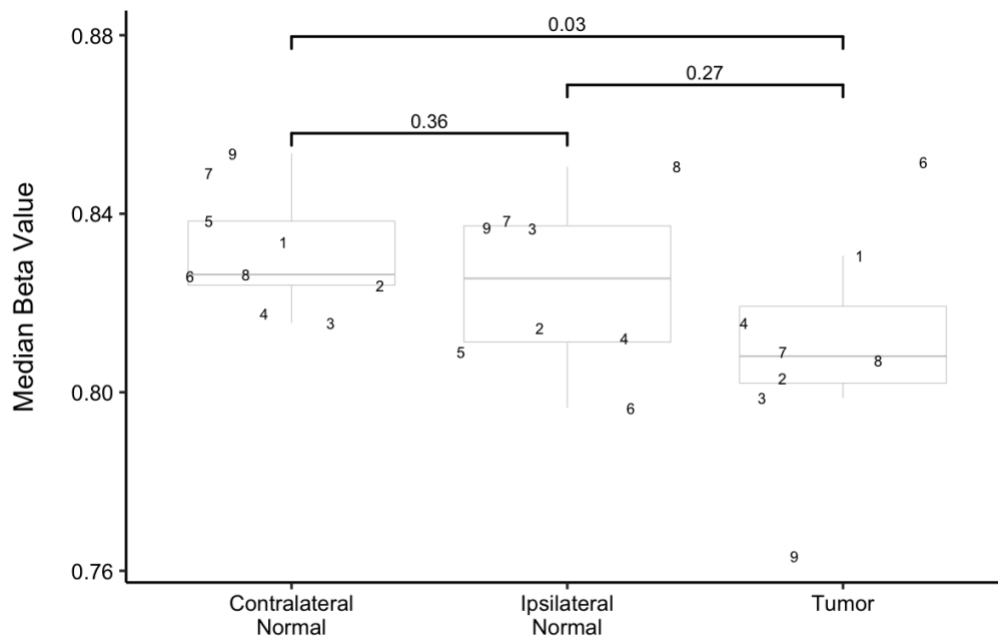

**B** Median methylation of *LINE-1* repetitive elements by tissue type

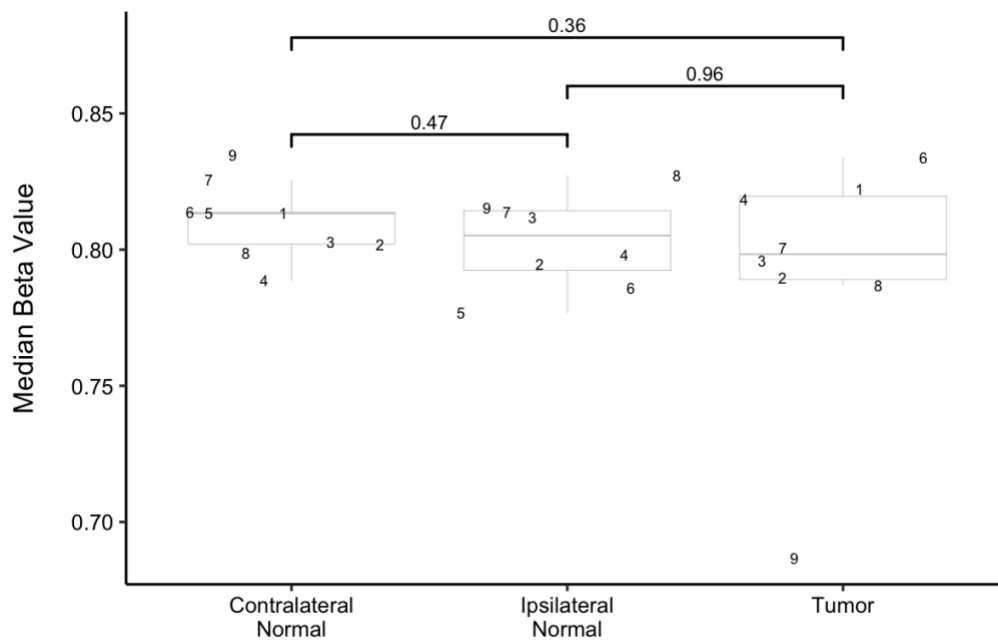

**Figure S1** Distribution of the median predicted beta values for each subject by tissue type for (A) *Alu* and (B) *LINE-1* repetitive elements respectively. The number of each point reflects the subject from which the tissue was collected (corresponding to the subject numbers in Table 1). P values reflect the results of a Wilcoxon rank-sum test between each tissue type.

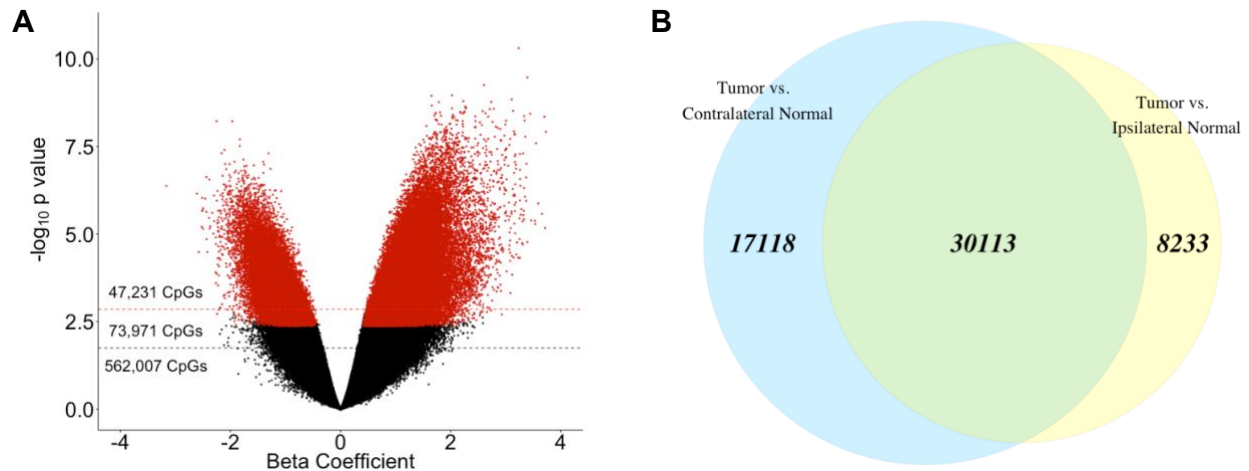

**Figure S2** Sensitivity analysis of epigenome wide analysis restricting to contralateral normal samples ( $n = 8$ ) with matched ipsilateral normal samples. (A) Change in methylation M-value for each CpG locus in tumor relative to contralateral-normal tissue. The red dashed line indicates a significance threshold of  $q < 0.01$  and the black dashed line indicates a significance threshold of  $q < 0.05$ . CpGs are colored (red) by loci that were identified as significant in the tumor versus contralateral-normal tissue ( $q < 0.01$ ) analysis including all available samples. (B) Overlap (green) between significantly differentially methylated CpG loci ( $q < 0.01$ ) in tumor versus contralateral-normal and tumor versus ipsilateral-normal tissue.
